# Supplementary material
Source: PubMed Central journal article supplement (PMC3129211)
Supplement: supp_M110.183376_jbc.M110.183376-1.pdf [file supp_M110.183376_jbc.M110.183376-1.pdf]

# Supplementary Fig. S1

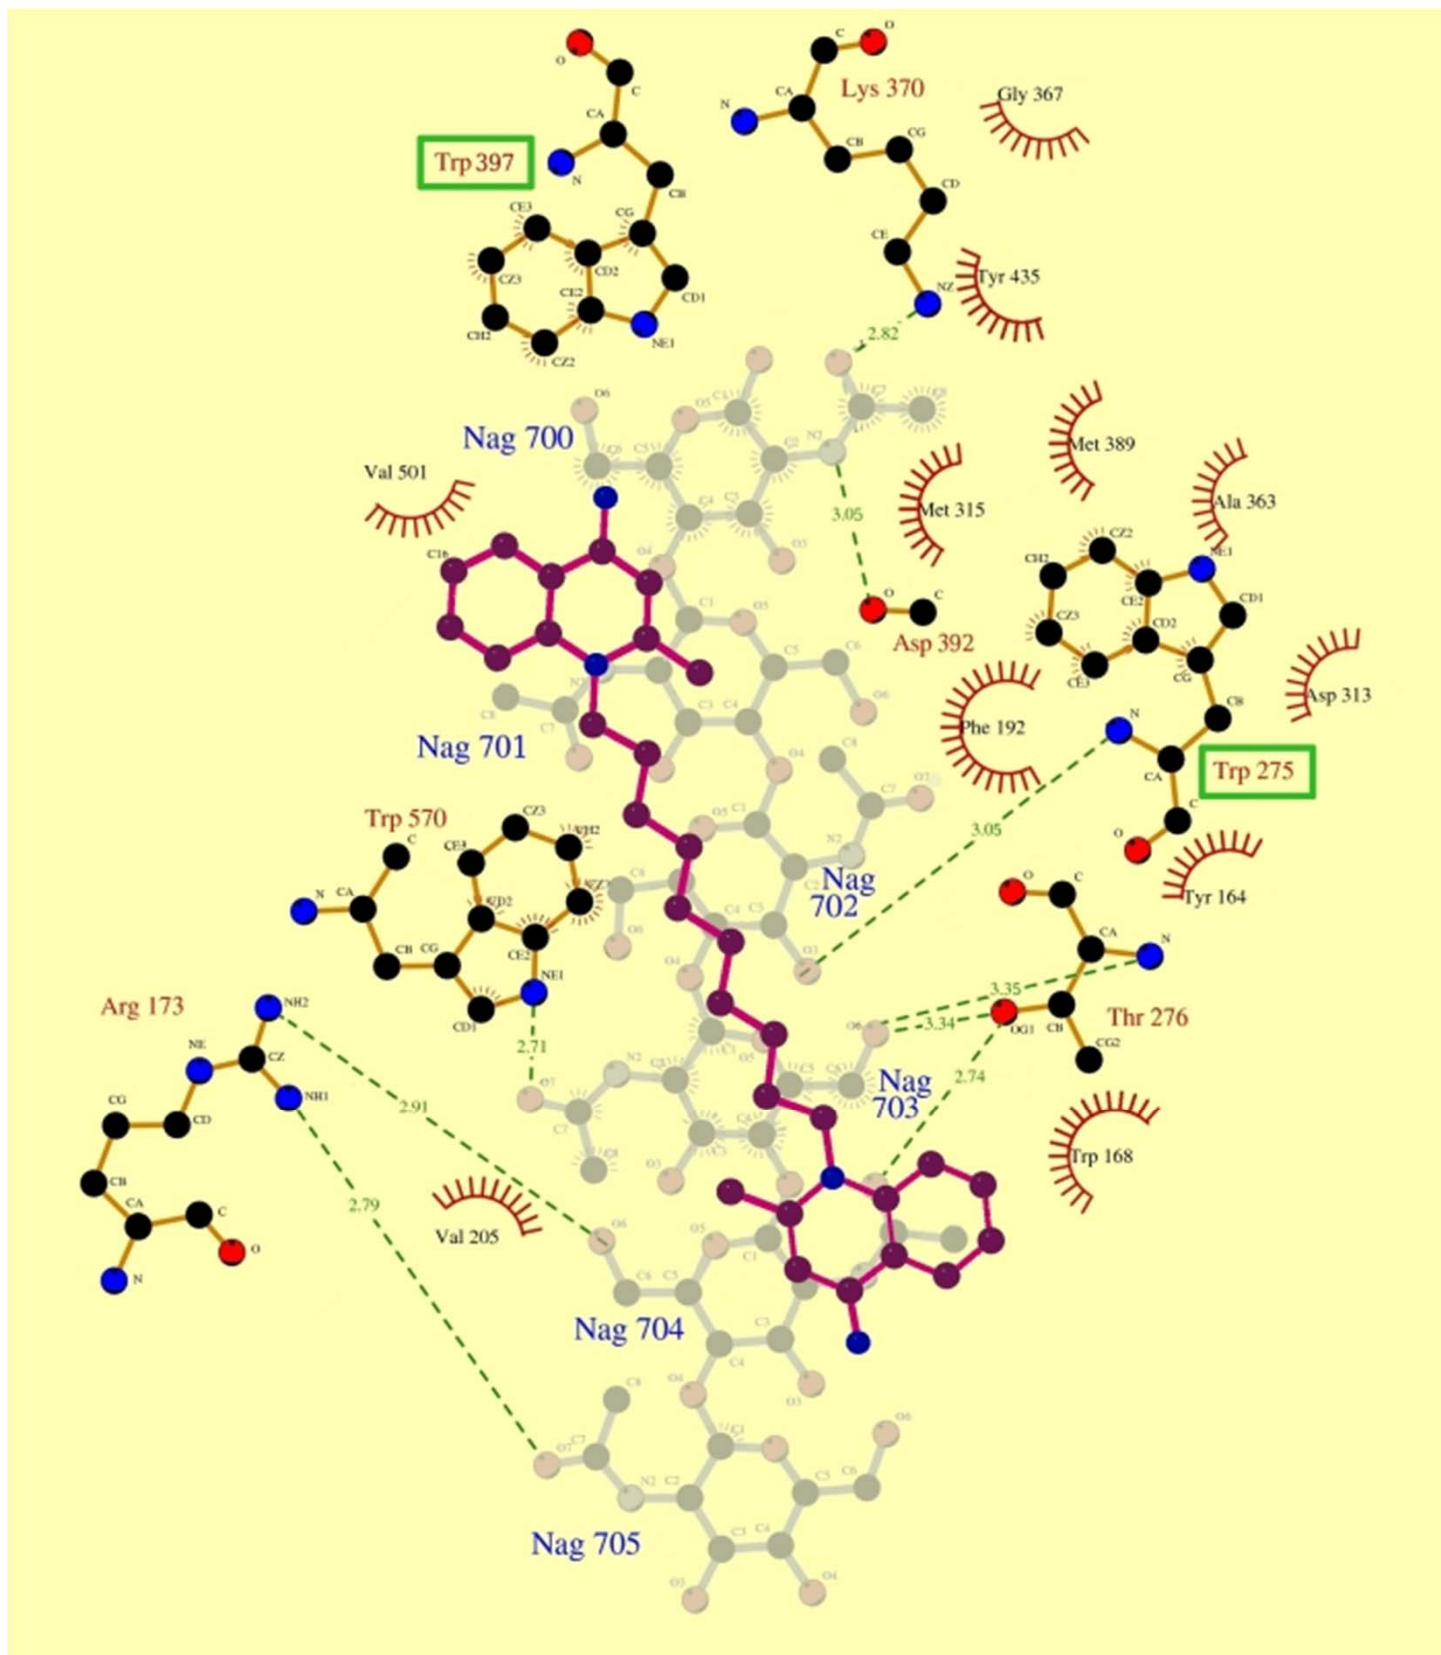

# Supplementary Fig. S2

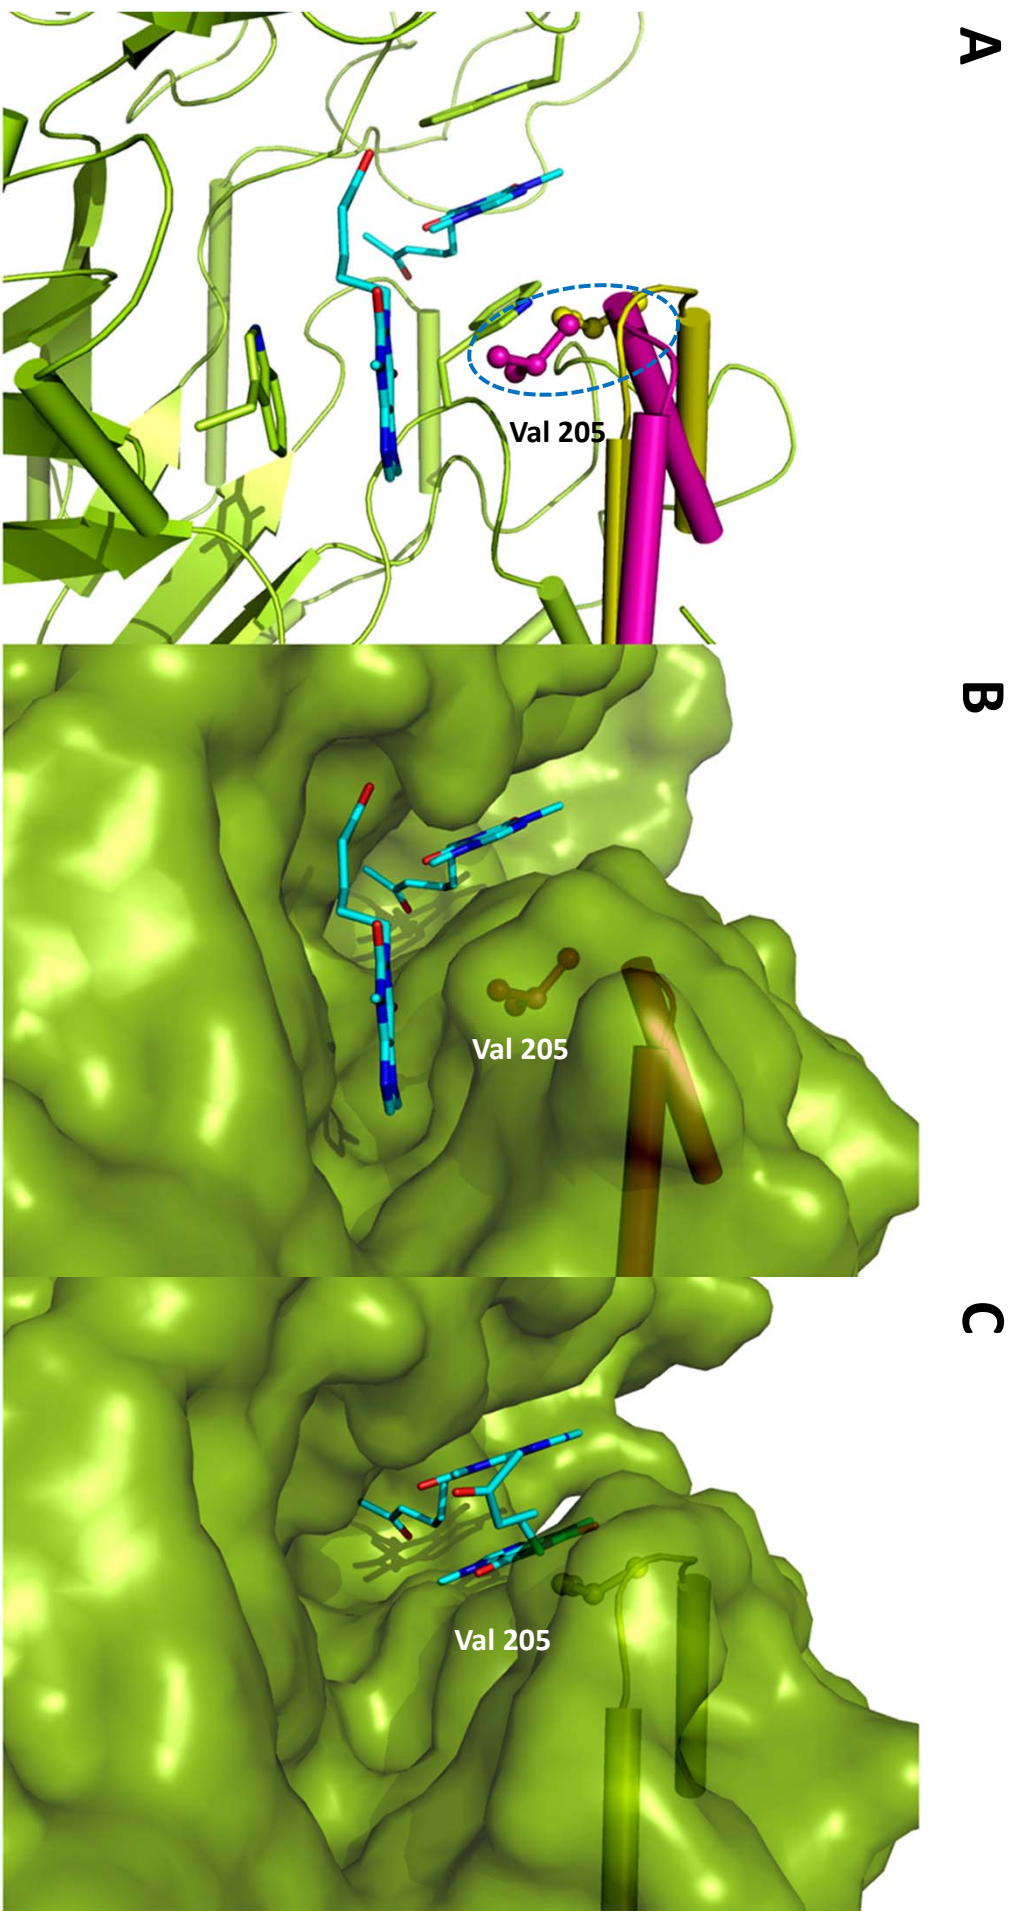

**Supplementary Legends and Tables**  
**Legends to supplementary figures**

Fig. S1 (related to Figure 2)

Schematic protein-ligand interactions of dequalinium and chitihexaose substrate (GlcNAc<sub>6</sub>) calculated with LIGPLOT. Dequalinium shows exclusively hydrophobic contacts whereas the GlcNAc<sub>6</sub> has a number of potential hydrogen bonds to the chitinase.

Fig. S2 (related to Figures 2&3)

Comparison of the loop containing Val205 in wild type and the mutant W275G: Opening of the location 2 in the mutant due to changes in the backbone conformation leads to loss of potential interactions and thus an empty binding site in the mutant.

Table S1. Details of data collection and structure refinement.

Unit cell for space group “P2<sub>1</sub>”: 65.1 50.9 93.2 90 99.5 90, for “P2<sub>1</sub>-A”: 60.0 85.3 63.0 90 112.9 90

| Crystal                                | WT-APO<br>3ARO            | WT-DEQ<br>3ARP            | WT-IDA<br>3ARQ          | WT-SAN<br>3ARV            | WT-CHE<br>3ARW            | WT-PRO<br>3ARX            | WT-IMI<br>3ARY            | WT-PEN<br>3ARR            | WT-IMI<br>3ARZ            | W275G-<br>APO<br>3ARS                                | W275G-<br>DEQ<br>3ART                                | W275G<br>-SAN<br>3AS0                                | W275G-<br>CHE<br>3AS1                                | W275G-<br>PRO<br>3AS2                                | W275G-<br>IMI<br>3AS3                                | W275G –<br>PEN<br>3ARU                               |
|----------------------------------------|---------------------------|---------------------------|-------------------------|---------------------------|---------------------------|---------------------------|---------------------------|---------------------------|---------------------------|------------------------------------------------------|------------------------------------------------------|------------------------------------------------------|------------------------------------------------------|------------------------------------------------------|------------------------------------------------------|------------------------------------------------------|
| Space group                            | <i>P</i> <sub>21</sub>    | <i>P</i> <sub>21</sub>    | <i>P</i> <sub>21</sub>  | <i>P</i> <sub>21</sub>    | <i>P</i> <sub>21</sub>    | <i>P</i> <sub>21</sub>    | <i>P</i> <sub>21</sub>    | <i>P</i> <sub>21</sub> -A | <i>P</i> <sub>21</sub> -A | <i>P</i> <sub>21</sub> 2 <sub>1</sub> 2 <sub>1</sub> |
| Resolution range (Å)                   | 19.82-2.22<br>(2.28-2.22) | 19.96-1.55<br>(1.59-1.55) | 19.90-1.5<br>(1.54-1.5) | 38.04-1.50<br>(1.54-1.50) | 39.81-1.50<br>(1.54-1.50) | 40.66-1.16<br>(1.19-1.16) | 19.97-1.35<br>(1.39-1.35) | 19.95-1.65<br>(1.69-1.65) | 19.94-1.82<br>(1.87-1.82) | 19.78-2.45<br>(2.51-2.45)                            | 19.9-2.23<br>(2.29-2.23)                             | 33.43-2.0<br>(2.05-2.0)                              | 19.96-2.0<br>(2.05-2.0)                              | 36.49-1.80<br>(1.85-1.80)                            | 46.58-2.4<br>(2.5-2.4)                               | 40.62-1.90<br>(1.95-1.90)                            |
| No of observed reflections             | 68816                     | 291154                    | 698077                  | 344568                    | 268054                    | 786080                    | 482805                    | 211087                    | 158556                    | 67399                                                | 119424                                               | 311975                                               | 268938                                               | 210243                                               | 90927                                                | 343052                                               |
| No of unique reflections               | 28030                     | 82238                     | 95004                   | 95064                     | 90870                     | 199166                    | 123615                    | 66052                     | 49568                     | 19696                                                | 27041                                                | 38365                                                | 39084                                                | 51578                                                | 22493                                                | 45190                                                |
| Redundancy                             | 2.46                      | 3.54                      | 7.3                     | 3.62                      | 2.95                      | 3.78                      | 3.90                      | 3.20                      | 3.20                      | 3.42                                                 | 4.16                                                 | 8.13                                                 | 6.88                                                 | 4.08                                                 | 4.04                                                 | 7.59                                                 |
| <i>I</i> / $\sigma$ ( <i>I</i> )       | 15.91(6.34)               | 19.14(3.50)               | 23.76(7.19)             | 16.79(8.33)               | 14.86(4.04)               | 12.88(3.76)               | 16.94(3.29)               | 12.80(4.21)               | 13.72(4.16)               | 14.47(4.08)                                          | 18.45(6.09)                                          | 19.21(6.45)                                          | 13.27(5.43)                                          | 16.78(4.38)                                          | 13.54(6.54)                                          | 18.32(8.14)                                          |
| Completeness (%)                       | 94.7(85.8)                | 93.4<br>(77.0)            | 98.3(95.1)              | 98.0<br>(91.8)            | 94.0<br>(74.8)            | 95.8<br>(79.1)            | 93.2(85.0)                | 93.8<br>(88.0)            | 94.2<br>(89.5)            | 91.0<br>(67.5)                                       | 94.1<br>(67.4)                                       | 97.4<br>(94.1)                                       | 96.9<br>(93.5)                                       | 96.1<br>(89.5)                                       | 97.1<br>(93.7)                                       | 98.3<br>(95.8)                                       |
| R <sub>merge</sub> (%)                 | 5.7(15.3)                 | 4.2(28.5)                 | 7.1(47.5)               | 6.3(15.0)                 | 5.1(27.0)                 | 5.9(27.6)                 | 5.1(44.0)                 | 6.9(42.0)                 | 6.0(40.8)                 | 8.2(30.3)                                            | 7.8(29.6)                                            | 8.3(38.2)                                            | 13.2(48.5)                                           | 6.1(35.1)                                            | 11.2(44.7)                                           | 11.9(34.9)                                           |
| R <sub>cryst</sub> , R <sub>free</sub> | 14.3,21.6                 | 14.6,18.7                 | 14.5, 18.4              | 14.4,17.7                 | 15.3,19.0                 | 16.0,18.5                 | 16.3,19.4                 | 14.3,18.8                 | 14.8,19.1                 | 19.8,25.9                                            | 16.2,22.9                                            | 14.5,19.7                                            | 15.3,20.5                                            | 15.0,19.6                                            | 15.4,23.0                                            | 14.4,19.6                                            |
| Rmsd from ideal geometry               |                           |                           |                         |                           |                           |                           |                           |                           |                           |                                                      |                                                      |                                                      |                                                      |                                                      |                                                      |                                                      |
| Bonds (Å)                              | 0.021                     | 0.029                     | 0.029                   | 0.029                     | 0.029                     | 0.034                     | 0.032                     | 0.029                     | 0.027                     | 0.006                                                | 0.021                                                | 0.024                                                | 0.025                                                | 0.025                                                | 0.019                                                | 0.024                                                |
| Angles (°)                             | 1.828                     | 2.391                     | 2.335                   | 2.437                     | 2.427                     | 2.597                     | 2.542                     | 2.368                     | 2.109                     | 0.865                                                | 1.765                                                | 1.903                                                | 1.862                                                | 2.019                                                | 1.748                                                | 1.981                                                |
| B factor (Å <sup>2</sup> )             |                           |                           |                         |                           |                           |                           |                           |                           |                           |                                                      |                                                      |                                                      |                                                      |                                                      |                                                      |                                                      |
| Bonded,                                | 14.1                      | 16.8                      | 15.0                    | 15.2                      | 17.7                      | 17.4                      | 18.1                      | 19.2                      | 25.1                      | 19.6                                                 | 16.7                                                 | 21.6                                                 | 19.7                                                 | 18.8                                                 | 22.9                                                 | 15.3                                                 |
| mainchain                              | 11.6                      | 12.9                      | 10.8                    | 10.6                      | 12.4                      | 11.9                      | 12.8                      | 14.4                      | 20.8                      | 19.6                                                 | 14.5                                                 | 18.9                                                 | 16.5                                                 | 15.1                                                 | 20.9                                                 | 11.6                                                 |
| protein <sup>a</sup>                   | 12.4                      | 14.1                      | 12.2                    | 12.1                      | 14.1                      | 13.3                      | 14.3                      | 16.5                      | 23.3                      | 19.6                                                 | 14.9                                                 | 20.2                                                 | 17.8                                                 | 16.6                                                 | 22.2                                                 | 13.0                                                 |
| ligands <sup>a</sup>                   | -                         | 17.8                      | 22.0                    | 46.6                      | 29.7                      | 26.4                      | 38.2                      | 35.8                      | 79.9                      | -                                                    | 61.6                                                 | 51.6                                                 | 76.3                                                 | 52.4                                                 | 75.8                                                 | 39.6                                                 |
| water <sup>a</sup>                     | 25.5                      | 30.7                      | 29.7                    | 29.4                      | 34.4                      | 33.9                      | 35.1                      | 35.4                      | 38.9                      | 20.7                                                 | 23.6                                                 | 32.2                                                 | 30.7                                                 | 30.2                                                 | 26.4                                                 | 28.2                                                 |

<sup>a</sup><B> = average B factor. Values in parentheses are for the highest resolution shell.

Table S2. (related to Schemes 1-3 and Figure 6)

Parameters used for the calculation of theoretical curves in Figure 6.

Number of binding sites (N), equilibrium dissociation constants  $K_D$ , enthalpy changes  $\Delta H$ ,  $IC_{50}$  values, and Hill coefficients  $n_H$ , which have been used for the calculation of the theoretical curves, are shown for the two inhibitors DEQ and SAN and *VhChiA* wild-type (WT) or mutant W275G in Figure 6. All ITC data were first fitted to a single-site binding model, yielding N,  $K_D$ , and  $\Delta H$  values upon binding. If the single-site binding model was unsatisfactory, then the data were fitted with a fixed number of N=2 using a two-independent-site model or a two-sequential-site model. Based on such multi-parameter fits, the resultant  $K_{D1}$ ,  $K_{D2}$ ,  $\Delta H1$  and  $\Delta H2$  values were correlated, and hence could not be derived unambiguously. The corresponding parameters for two PEN molecules bound to W275G were evaluated, but are not shown in Figure 6. The reaction scheme, to which the ITC data were fitted, is indicated as: 1 for one-site binding; 2 for independent two-site binding; or 3 for sequential two-site binding.

| Enzyme-inhibitor complex | Binding to one site<br>(Black lines in Figure 6) |                            |                                         |                                         |                                        | Binding to two independent sites or sequential sites |   |                               |                               |                                          |                                          |                                          |                                          |                                         |                                         |                                |       |
|--------------------------|--------------------------------------------------|----------------------------|-----------------------------------------|-----------------------------------------|----------------------------------------|------------------------------------------------------|---|-------------------------------|-------------------------------|------------------------------------------|------------------------------------------|------------------------------------------|------------------------------------------|-----------------------------------------|-----------------------------------------|--------------------------------|-------|
|                          | N                                                | $K_D$<br>( $\mu\text{M}$ ) | $\Delta G$<br>(kcal mol <sup>-1</sup> ) | $\Delta H$<br>(kcal mol <sup>-1</sup> ) | $\Delta S$<br>(cal mol <sup>-1</sup> ) | Scheme                                               | N | $K_{D1}$<br>( $\mu\text{M}$ ) | $K_{D2}$<br>( $\mu\text{M}$ ) | $\Delta G1$<br>(kcal mol <sup>-1</sup> ) | $\Delta G2$<br>(kcal mol <sup>-1</sup> ) | $\Delta H1$<br>(kcal mol <sup>-1</sup> ) | $\Delta H2$<br>(kcal mol <sup>-1</sup> ) | $\Delta S1$<br>(cal mol <sup>-1</sup> ) | $\Delta S2$<br>(cal mol <sup>-1</sup> ) | $IC_{50}$<br>( $\mu\text{M}$ ) | $n_H$ |
| DEQ WT <sup>a</sup>      | 1.1                                              | 0.07                       | -9.8                                    | -8.7                                    | 3.5                                    | 1                                                    | - | -                             | -                             | -                                        | -                                        | -                                        | -                                        | -                                       | -                                       | 0.4                            | 1.4   |
| SAN WT                   | 1.3                                              | 2.3                        | -7.7                                    | -7.9                                    | -0.7                                   | 2                                                    | 2 | 0.3                           | 0.8                           | -8.7                                     | -8.1                                     | -4.5                                     | -8.3                                     | 14.4                                    | -0.6                                    | 2.3                            | 0.9   |
| PEN WT                   | 1.2                                              | 4.0                        | -7.4                                    | 13                                      | 68.3                                   | 2                                                    | 2 | 2                             | 10                            | -7.6                                     | -6.7                                     | -16                                      | -1                                       | -28.9                                   | 19.4                                    | 3.5                            | 1     |
| DEQ W275G <sup>b</sup>   | 1.3                                              | 37                         | -6.0                                    | -3.0                                    | 10.2                                   | 2                                                    | 2 | 11                            | 500                           | -6.6                                     | -4.4                                     | -2.7                                     | -1.5                                     | 13.4                                    | 9.9                                     | 68                             | 0.7   |
| SAN W275G                | 3.9                                              | 28                         | -6.2                                    | -4.0                                    | 7.4                                    | 3                                                    | 2 | 214                           | 66                            | -4.9                                     | -5.6                                     | -9.2                                     | -6.4                                     | -14.8                                   | -2.9                                    | 71                             | 1.4   |
| PEN W275G                | 1.8                                              | 600                        | -4.4                                    | -11                                     | -22.2                                  | 3                                                    | 2 | 93                            | 690                           | -5.4                                     | -4.2                                     | -2.6                                     | -4.1                                     | 9.5                                     | 0.4                                     | 260                            | 1.9   |

<sup>a</sup>The ITC experiments of WT were carried out at 25°C (298 K).

<sup>b</sup>The ITC experiments of W275G were carried out at 18°C (291 K).
